# Supplementary material for: Slow magnetic relaxation of a mononuclear dysprosium complex derived from 4,4,4-trifluoro-1-(2-naphthyl)-1,3-butanedione and 1,10-phenanthroline
Source: Royal Society of Chemistry journal article supplement (doi:10.1039/d2nj04495a), 2022-12-12
Supplement: d2nj04495a1.pdf [file d2nj04495a1.pdf]

**Slow magnetic relaxation of a mononuclear dysprosium complex  
derived from 4,4,4-trifluoro-1-(2-naphthyl)-1,3-butanedione and  
1,10-phenanthroline**

Shan-Shan Liu,<sup>\*a</sup> Qi-Ming Guo<sup>a</sup>, Bin Liu,<sup>a</sup> Teng-Hui Jin<sup>a</sup>, Zi-Hao Zhang<sup>a</sup>, Shijing Lin<sup>a</sup> and Yin-Shan Meng<sup>\*b</sup>

<sup>a</sup>Beijing Key Laboratory of Fuels Cleaning and Advanced Catalytic Emission Reduction Technology, College of New Materials and Chemical Engineering, Beijing Institute of Petrochemical Technology, Beijing 102617, P. R. China. E-mail: [liushanshan2015@bipt.edu.cn](mailto:liushanshan2015@bipt.edu.cn)

<sup>b</sup>State Key Laboratory of Fine Chemicals, Dalian University of Technology, Dalian, 116024, P. R. China. E-mail: [mengys@dlut.edu.cn](mailto:mengys@dlut.edu.cn)

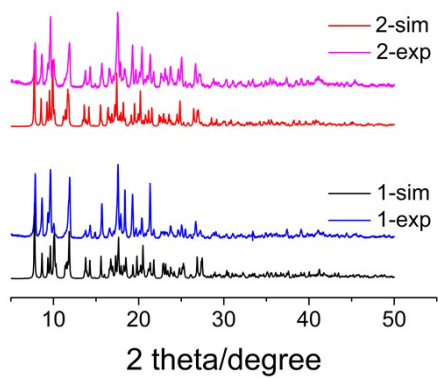

**Fig S1** Powder X-ray diffraction data of complexes **1** and **2**

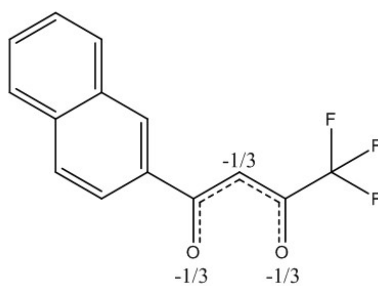

**Fig S2** The charge definition of the tfnb<sup>-</sup> ligand

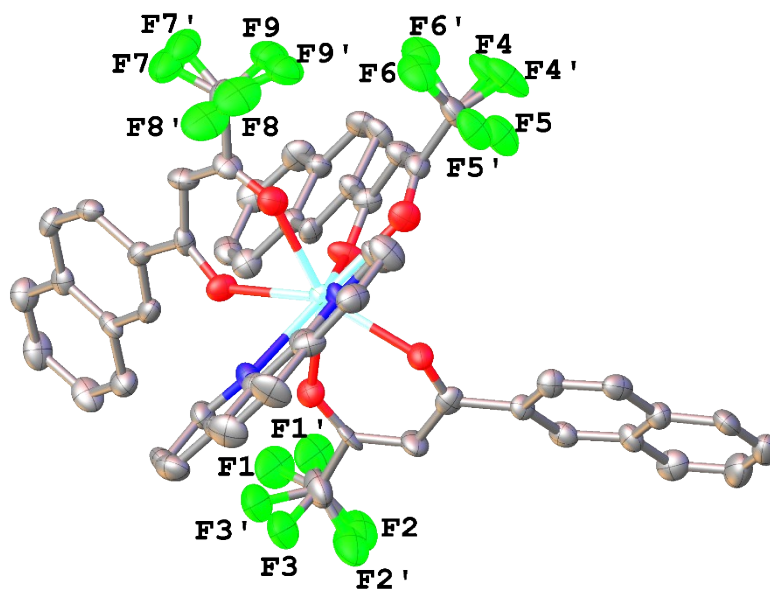

**Fig. S3** Molecular structure of complex **2**. Colour code: Tb, turquoise; O, red; N, blue; C, gray; F, green. Hydrogen atoms are omitted for clarity.

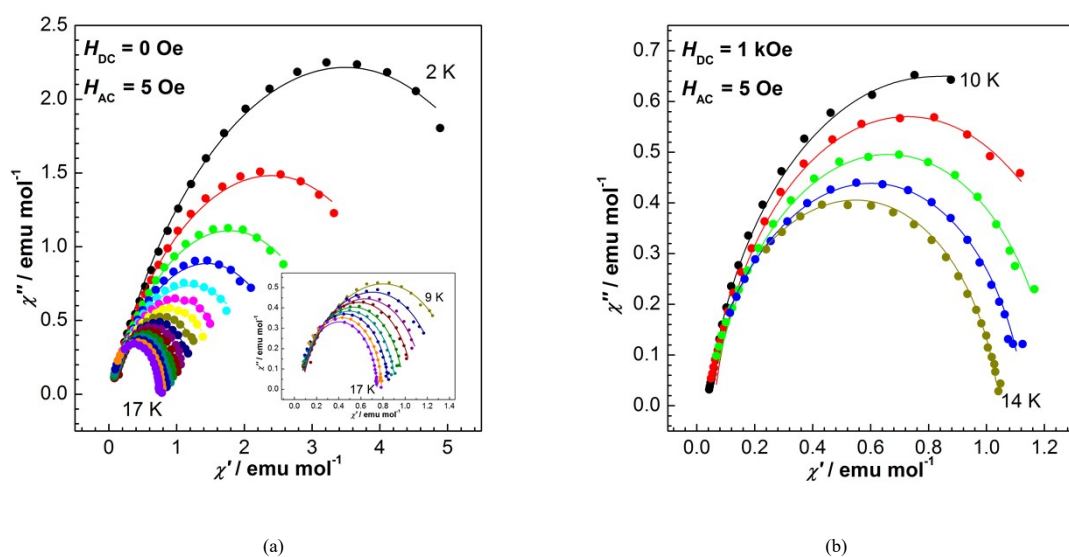

**Fig S4.** Cole-Cole Plots of complex **1** under zero dc field (a) and under a 1 kOe dc field (b). The inset in (a) shows a zoom-in view on the high temperature curves for clarity. The lines represent the best fits using the generalised Debye model.

**Table S1** Extracted parameters from the Cole-Cole plots with the generalized Debye functions for **1** in the absence of a dc field

| $T$ (K) | $\chi_s$ (cm <sup>3</sup> mol <sup>-1</sup> ) | $\chi_T$ (cm <sup>3</sup> mol <sup>-1</sup> ) | $\alpha$ | $\tau$ (s) |
|---------|-----------------------------------------------|-----------------------------------------------|----------|------------|
| 2       | 0.03897                                       | 6.48500                                       | 0.23086  | 7.2E-4     |
| 3       | 0.00581                                       | 4.45679                                       | 0.24987  | 7.1E-4     |
| 4       | 0.01918                                       | 3.30879                                       | 0.24282  | 6.4E-4     |
| 5       | 0.01994                                       | 2.68108                                       | 0.24980  | 6.2E-4     |
| 6       | 0.00638                                       | 2.24754                                       | 0.25814  | 5.9E-4     |
| 7       | 0.02713                                       | 1.89137                                       | 0.23660  | 5.3E-4     |
| 8       | 0.04552                                       | 1.66509                                       | 0.21551  | 5E-4       |
| 9       | 0.03771                                       | 1.47648                                       | 0.20339  | 4.3E-4     |
| 10      | 0.03162                                       | 1.31094                                       | 0.18158  | 3.5E-4     |
| 11      | 0.06509                                       | 1.16939                                       | 0.13397  | 2.8E-4     |
| 12      | 0.06457                                       | 1.07366                                       | 0.10275  | 2.2E-4     |
| 13      | 0.07000                                       | 0.98423                                       | 0.07568  | 1.7E-4     |
| 14      | 0.07000                                       | 0.91321                                       | 0.05491  | 1.2E-4     |
| 15      | 0.07000                                       | 0.84756                                       | 0.02634  | 8E-5       |
| 16      | 0.06966                                       | 0.78774                                       | 0.00858  | 5E-5       |
| 17      | 0.07000                                       | 0.74707                                       | 0.00832  | 3E-5       |

**Table S2** Extracted parameters from the Cole-Cole plots with the generalized Debye functions for **1** under a 1 kOe dc field

| $T$ (K) | $\chi_s$ (cm <sup>3</sup> mol <sup>-1</sup> ) | $\chi_T$ (cm <sup>3</sup> mol <sup>-1</sup> ) | $\alpha$ | $\tau$ (s) |
|---------|-----------------------------------------------|-----------------------------------------------|----------|------------|
| 10      | 0.04055                                       | 1.55019                                       | 0.09236  | 0.00144    |
| 11      | 0.05976                                       | 1.36827                                       | 0.08326  | 6.7E-4     |
| 12      | 0.05176                                       | 1.23378                                       | 0.10771  | 2.9E-4     |
| 13      | 0.01839                                       | 1.13381                                       | 0.14820  | 1.1E-4     |
| 14      | 0.00074                                       | 1.04422                                       | 0.15553  | 4E-5       |

The input file of complex **1** for the electrostatic calculations using MAGELLAN software:

! sites 1 1

|    |           |           |           |      |
|----|-----------|-----------|-----------|------|
| Dy | 10.651926 | 2.867948  | 17.671808 | +3   |
| F  | 10.202108 | -1.306017 | 15.072404 | 0    |
| F  | 11.798855 | -1.883849 | 16.350281 | 0    |
| F  | 9.858216  | -2.721326 | 16.622862 | 0    |
| F  | 11.716538 | 7.641297  | 17.464474 | 0    |
| F  | 11.479810 | 8.012039  | 15.366355 | 0    |
| F  | 9.765742  | 7.632139  | 16.588988 | 0    |
| F  | 7.885324  | 5.682586  | 20.680423 | 0    |
| F  | 8.385511  | 7.078144  | 19.154291 | 0    |
| F  | 6.387426  | 6.293532  | 19.300243 | 0    |
| O  | 10.657533 | 0.674353  | 16.841790 | -1/3 |
| O  | 9.831538  | 1.475290  | 19.346166 | -1/3 |
| O  | 11.119210 | 5.093162  | 17.215082 | -1/3 |
| O  | 11.254982 | 3.039219  | 15.443195 | -1/3 |
| O  | 9.100844  | 4.192780  | 18.884893 | -1/3 |
| O  | 8.647309  | 2.850987  | 16.532835 | -1/3 |
| N  | 13.089348 | 2.110518  | 17.631796 | 0    |
| N  | 12.095036 | 3.684611  | 19.618746 | 0    |
| C  | 10.483411 | -1.591911 | 16.310724 | 0    |
| C  | 10.191124 | -0.417556 | 17.258504 | 0    |
| C  | 9.521111  | -0.682400 | 18.436579 | -1/3 |
| H  | 9.177276  | -1.534371 | 18.580485 | 0    |
| C  | 9.342725  | 0.308775  | 19.430736 | 0    |
| C  | 8.536662  | -0.005233 | 20.645868 | 0    |
| C  | 8.767880  | 0.749936  | 21.827808 | 0    |
| H  | 9.417382  | 1.416415  | 21.831445 | 0    |
| C  | 8.040823  | 0.500905  | 22.956777 | 0    |
| H  | 8.206612  | 0.998165  | 23.725186 | 0    |
| C  | 7.037582  | -0.504068 | 22.978602 | 0    |
| C  | 6.303823  | -0.825915 | 24.148493 | 0    |
| H  | 6.481423  | -0.376704 | 24.943728 | 0    |

|   |           |           |           |      |
|---|-----------|-----------|-----------|------|
| C | 5.331724  | -1.799433 | 24.115756 | 0    |
| H | 4.856907  | -2.004343 | 24.889166 | 0    |
| C | 5.046392  | -2.490415 | 22.917675 | 0    |
| H | 4.375202  | -3.134567 | 22.902216 | 0    |
| C | 5.750087  | -2.218879 | 21.782794 | 0    |
| H | 5.560880  | -2.684375 | 21.001655 | 0    |
| C | 6.772297  | -1.229472 | 21.782794 | 0    |
| C | 7.550661  | -0.964449 | 20.631545 | 0    |
| H | 7.393225  | -1.447045 | 19.851315 | 0    |
| C | 11.035250 | 7.274982  | 16.385746 | 0    |
| C | 11.125387 | 5.757584  | 16.142948 | 0    |
| C | 11.134239 | 5.304270  | 14.842791 | -1/3 |
| H | 11.115288 | 5.919032  | 14.145085 | 0    |
| C | 11.172587 | 3.912457  | 14.547477 | 0    |
| C | 11.083776 | 3.432801  | 13.131604 | 0    |
| C | 11.135940 | 4.312202  | 12.015138 | 0    |
| H | 11.258189 | 5.224449  | 12.149041 | 0    |
| C | 11.005909 | 3.818760  | 10.745672 | 0    |
| H | 11.053314 | 4.402089  | 10.023414 | 0    |
| C | 10.800238 | 2.439487  | 10.511285 | 0    |
| C | 10.629468 | 1.907183  | 9.203399  | 0    |
| H | 10.676773 | 2.471377  | 8.466136  | 0    |
| C | 10.399594 | 0.576606  | 9.025164  | 0    |
| H | 10.303461 | 0.240331  | 8.163774  | 0    |
| C | 10.304963 | -0.300797 | 10.127081 | 0    |
| H | 10.118273 | -1.201143 | 9.989313  | 0    |
| C | 10.486443 | 0.173529  | 11.396774 | 0    |
| H | 10.447253 | -0.412591 | 12.117214 | 0    |
| C | 10.734497 | 1.555852  | 11.623659 | 0    |
| C | 10.898340 | 2.084020  | 12.924952 | 0    |
| H | 10.880374 | 1.509634  | 13.656304 | 0    |
| C | 7.677966  | 5.981685  | 19.399591 | 0    |
| C | 8.110981  | 4.838714  | 18.464542 | 0    |
| C | 7.393456  | 4.687313  | 17.285558 | -1/3 |
| H | 6.703038  | 5.280802  | 17.093683 | 0    |
| C | 7.687262  | 3.649055  | 16.369378 | 0    |
| C | 6.847419  | 3.444216  | 15.151064 | 0    |
| C | 5.617470  | 4.131993  | 14.936228 | 0    |
| H | 5.297617  | 4.721701  | 15.579599 | 0    |
| C | 4.905915  | 3.927780  | 13.785661 | 0    |
| H | 4.098144  | 4.373379  | 13.665398 | 0    |
| C | 5.372265  | 3.052729  | 12.771952 | 0    |
| C | 4.690274  | 2.880569  | 11.538406 | 0    |
| H | 3.886991  | 3.324926  | 11.389726 | 0    |

|   |           |          |           |   |
|---|-----------|----------|-----------|---|
| C | 5.203012  | 2.068191 | 10.565619 | 0 |
| H | 4.753096  | 1.979657 | 9.755153  | 0 |
| C | 6.406250  | 1.361755 | 10.776818 | 0 |
| H | 6.743491  | 0.807097 | 10.109803 | 0 |
| C | 7.075194  | 1.493316 | 11.961486 | 0 |
| H | 7.859734  | 1.013527 | 12.099026 | 0 |
| C | 6.591132  | 2.350726 | 12.984742 | 0 |
| C | 7.301080  | 2.564476 | 14.189416 | 0 |
| H | 8.092646  | 2.100273 | 14.336050 | 0 |
| C | 13.583666 | 1.363500 | 16.649461 | 0 |
| H | 13.028925 | 1.144763 | 15.936523 | 0 |
| C | 14.903885 | 0.889172 | 16.639230 | 0 |
| H | 15.208130 | 0.360022 | 15.936523 | 0 |
| C | 15.734473 | 1.210969 | 17.664760 | 0 |
| H | 16.610325 | 0.897144 | 17.673399 | 0 |
| C | 15.262988 | 2.022329 | 18.715980 | 0 |
| C | 13.919492 | 2.451023 | 18.657099 | 0 |
| C | 13.397364 | 3.294236 | 19.698543 | 0 |
| C | 14.244122 | 3.700493 | 20.751353 | 0 |
| C | 15.596751 | 3.224697 | 20.791820 | 0 |
| H | 16.145433 | 3.465723 | 21.501802 | 0 |
| C | 16.085098 | 2.433040 | 19.816987 | 0 |
| H | 16.969773 | 2.149418 | 19.858135 | 0 |
| C | 13.719671 | 4.576225 | 21.716184 | 0 |
| H | 14.246908 | 4.859021 | 22.429349 | 0 |
| C | 12.429546 | 5.009976 | 21.598422 | 0 |
| H | 12.077693 | 5.617626 | 22.208829 | 0 |
| C | 11.643853 | 4.523032 | 20.539473 | 0 |
| H | 10.759901 | 4.804175 | 20.483320 | 0 |
